# Supplementary material for: SCAI Staging Application for Acute Myocardial Infarction-Related Cardiogenic Shock at a Single-Center Russian Registry
Source: MDPI journal article supplement (doi:10.3390/jcm12247739), 2023-12-17
Supplement: s1 [file s1]

## Supplementary

**Table S1.** SCAI classification.

| Stage             | Characteristics                                                                                                                    |
|-------------------|------------------------------------------------------------------------------------------------------------------------------------|
| At risk (A)       | <ul style="list-style-type: none"> <li>Neither hypotension nor hypoperfusion</li> <li>Large acute myocardial infarction</li> </ul> |
| Beginning (B)     | <ul style="list-style-type: none"> <li>Hypotension without hypoperfusion</li> </ul>                                                |
| Classic (C)       | <ul style="list-style-type: none"> <li>Hypoperfusion without deterioration</li> </ul>                                              |
| Deteriorating (D) | <ul style="list-style-type: none"> <li>Hypoperfusion with deterioration</li> <li>Not refractory shock</li> </ul>                   |
| Extremis (E)      | <ul style="list-style-type: none"> <li>Hypoperfusion with deterioration and refractory shock</li> </ul>                            |

  

| Term                              | Definition                                                                                                                                                                                                                                                                          |
|-----------------------------------|-------------------------------------------------------------------------------------------------------------------------------------------------------------------------------------------------------------------------------------------------------------------------------------|
| Large acute myocardial infarction | <ul style="list-style-type: none"> <li>HS TnI &gt; 1 ng</li> </ul>                                                                                                                                                                                                                  |
| Hypotension/tachycardia           | Presence of any following criteria: <ul style="list-style-type: none"> <li>Admission systolic BP &lt;90mmHg</li> <li>Minimum systolic BP &lt;90mmHg during first 1 h</li> <li>Need for vasoactives to maintain systolic BP &gt;90 mmHg</li> <li>Admission MAP &lt;60mmHg</li> </ul> |
| Hypoperfusion                     | Presence of any following criteria: <ul style="list-style-type: none"> <li>Admission lactate &gt;2 mmol/L</li> <li>Urine output &lt;720 ml during first 24 h or &lt;30 ml/h</li> <li>Cold, clammy skin</li> <li>Altered mental status</li> </ul>                                    |
| Deterioration                     | Presence of all following criteria: <ul style="list-style-type: none"> <li>Number of vasoactives during first 1 h &gt; 1 and IABP during first 24 h</li> <li>Admission lactate &gt;2 mmol/l but &lt;8 mmol/L</li> </ul>                                                             |
| Refractory shock                  | Presence of any following criteria: <ul style="list-style-type: none"> <li>Admission lactate &gt;8 mmol/L</li> <li>pH&lt;7.2</li> <li>CPR (A-modifier)</li> </ul>                                                                                                                   |

**Table S2.** Characteristics of myocardial infarction.

| Parameter             | N   | A and B (n=8) | C (n=73)    | D (n=10)   | E (n=26)    | P value |
|-----------------------|-----|---------------|-------------|------------|-------------|---------|
| CHARACTERISTICS OF MI |     |               |             |            |             |         |
| STEMI                 | 117 | 7 (87.5%)     | 58 (79.5 %) | 8 (80.0 %) | 18 (69.2 %) | 0.641   |
| non-STEMI             |     | 1 (12.5%)     | 15 (20.5 %) | 2 (20.0 %) | 8 (30.8 %)  |         |
| Primary MI            | 117 | 5 (62.5%)     | 39 (53.4 %) | 5 (50.0 %) | 20 (76.9 %) | 0.190   |
| Recurrent MI          |     | 3 (37.5%)     | 34 (46.6 %) | 5 (50.0 %) | 6 (23.1 %)  |         |
| CABG in anamnesis     | 105 | 0 (0.0%)      | 2 (3.0 %)   | 1 (14.3 %) | 1 (4.0 %)   | 0.482   |
| PCI in anamnesis      | 112 | 0 (0.0%)      | 9 (13.0 %)  | 1 (10.0 %) | 3 (11.5 %)  | 0.781   |
| Q-wave MI             | 116 | 7 (87.5%)     | 50 (68.5 %) | 8 (80.0 %) | 15 (60.0 %) | 0.424   |

| LOCALIZATION OF MI                        |     |                        |                        |                         |                        |        |
|-------------------------------------------|-----|------------------------|------------------------|-------------------------|------------------------|--------|
| Anterior                                  | 117 | 5 (62.5%)              | 41 (56.2 %)            | 5 (50.0 %)              | 14 (53.8 %)            | 0.329  |
| Inferior                                  |     | 3 (37.5%)              | 29 (39.7 %)            | 5 (50.0 %)              | 7 (26.9 %)             |        |
| Anterior-inferior                         |     | 0 (0.0 %)              | 3 (4.1 %)              | 0 (0.0 %)               | 4 (15.4 %)             |        |
| RV MI                                     |     | 0 (0.0 %)              | 0 (0.0 %)              | 0 (0.0 %)               | 1 (3.8 %)              |        |
| MANAGEMENT                                |     |                        |                        |                         |                        |        |
| Primary PCI                               | 114 | 5 (62.5%)              | 45 (62.5 %)            | 9 (90.0 %)              | 13 (54.2 %)            | 0.711  |
| Pharmaco-invasive strategy                |     | 2 (25.0%)              | 9 (12.5 %)             | 1 (10.0 %)              | 3 (12.5 %)             |        |
| Trombolysis only                          |     | 0 (0.0 %)              | 2 (2.8 %)              | 0 (0.0 %)               | 1 (4.2 %)              |        |
| Conservative strategy                     |     | 1 (12.5%)              | 16 (22.2 %)            | 0 (0.0 %)               | 7 (29.2 %)             |        |
| EXTENT OF CAD                             |     |                        |                        |                         |                        |        |
| 1-vessel                                  | 98  | 0 (0.0 %)              | 15 (23.4 %)            | 2 (20.0 %)              | 6 (33.4 %)             | 0.590  |
| 2-vessel                                  |     | 2 (33.3%)              | 20 (31.3 %)            | 4 (40.0 %)              | 4 (22.2 %)             |        |
| 3-vessel                                  |     | 4 (66.7%)              | 29 (45.3 %)            | 4 (40.0 %)              | 8 (44.4 %)             |        |
| TIME                                      |     |                        |                        |                         |                        |        |
| “Door-to-balloon”, min.                   | 95  | 107.0<br>(51.8; 159.0) | 62.5<br>(52.3; 138.0)  | 116.0<br>(59.8;228.5)   | 51.0<br>(43.0; 115.0)  | 0.324  |
| “Of onset of symptoms to admission”, min. | 107 | 164.0<br>(95.0; 641.0) | 218.5<br>(120.0;453.0) | 306.0<br>(150.8;498.0)  | 153.0<br>(90.0; 410.0) | 0.710  |
| ECHOCARDIOGRAPHY ON ADMISSION             |     |                        |                        |                         |                        |        |
| EF LV, %                                  | 103 | 52.5<br>(42.0;62.3)    | 44.0<br>(31.0; 54.3)   | 42.0<br>(39.0; 47.3)    | 45.0<br>(40.0; 56.0)   | 0.729  |
| ESV LV, mL                                | 55  | 86.0<br>(61.5-93.0)    | 59.0<br>(37.0-76.5)    | 63.0<br>(40.5-73.5)     | 62.0<br>(45.0-98.0)    | 0.740  |
| EDV LV, mL                                | 78  | 120.0<br>(108.0;135.0) | 103.0<br>(80.0; 130.0) | 98.0<br>(94.0;124.0)    | 100.0<br>(75.0; 129.0) | 0.592  |
| PCWP, mm Hg                               | 43  | 11.8<br>(11.7; 12.0)   | 13.6<br>(10.7; 16.6)   | 17.7<br>(15.3; 18.2)    | 14.8<br>(11.7; 18.2)   | 0.708  |
| RV pressure, mmHg                         | 48  | 27.0<br>(27.0; 38.0)   | 41.0<br>(35.5; 55.0)   | 30.0<br>(28.5; 35.0)    | 42.5<br>(36.3; 47.3)   | 0.191  |
| CI, L/min/m2                              | 51  | 2.15<br>(2.02; 2.27)   | 2.1<br>(1.6; 2.5)      | 1.9<br>(1.8; 2.3)       | 2.2<br>(1.7; 2.3)      | 0.994  |
| IVLC                                      | 50  | 2.19<br>(1.69; 2.25)   | 1.6<br>(1.2; 2.1)      | 1.4<br>(1.2; 1.7)       | 1.7<br>(1.3; 2.0)      | 0.700  |
| LABORATORY AT ADMISSION                   |     |                        |                        |                         |                        |        |
| CK, mcg/L                                 | 117 | 645<br>(201.0;768.0)   | 175.0<br>(102.0;599.0) | 380.5<br>(123.3;1422.8) | 200.5<br>(100.5;413.3) | 0.476  |
| CK-MB, mcg/L                              | 117 | 61.0<br>(45.8; 73.3)   | 46.0<br>(25.0; 74.0)   | 42.0<br>(26.8;331.0)    | 51.5<br>(35.8; 114.3)  | 0.529  |
| Troponin at the admission, ng/mL          | 89  | 2.80<br>(0.715; 16.6)  | 0.33<br>(0.05; 2.29)   | 0.79<br>(0.61; 5.90)    | 0.37<br>(0.08; 0.72)   | 0.289  |
| Lactate, mmol/L                           | 104 | 1.70                   | 3.4                    | 4.8                     | 8.6                    | <0.001 |

|                                       |     |                      |                      |                      |                      |         |
|---------------------------------------|-----|----------------------|----------------------|----------------------|----------------------|---------|
|                                       |     | (1.30; 1.70)         | (2.4; 5.6)           | (4.2; 6.0)           | (6.9; 11.4)          |         |
| PHv                                   | 95  | 7.39<br>(7.36; 7.44) | 7.30<br>(7.27; 7.34) | 7.29<br>(7.26; 7.31) | 7.14<br>(7.06; 7.18) | < 0.001 |
| Monocytes,<br>10 <sup>9</sup> /microL | 117 | 1.15<br>(0.96; 1.23) | 0.98<br>(0.68; 1.32) | 0.53<br>(0.44; 0.68) | 0.78<br>(0.49; 0.94) | 0.005   |

Footnotes: Data displayed as n (%) for categorical variables and median (interquartile range) for continuous variables. P value is for  $\chi^2$  test and Fisher's exact test was used for small samples (categorical variables) and Kruskal-Wallis test (continuous variables). Abbreviation: CABG, coronary artery bypass graft; CAD, coronary artery disease; CI, cardiac index; CO, cardiac output; CK, creatine kinase; CPK, creatine phosphokinase; EF, ejection fraction; EDV, end-diastolic volume; ESV, end-systolic volume; IVLC, index of violation of local contractility; LV, left ventricular; MI, myocardial infarction; PCWP, pulmonary capillary wedge pressure; PCI, percutaneous coronary intervention; RV, right ventricular; STEMI, ST elevation myocardial infarction.

**Table S3.** Clinical, laboratory, functional, anatomical features versus SCAI stage of cardiogenic shock classification scale.

| Parameter                           | N   | A+B<br>(n=8)            | C (n=73)             | D (n=10)             | E (n=26)             | P<br>value | Fisher's exact<br>test |
|-------------------------------------|-----|-------------------------|----------------------|----------------------|----------------------|------------|------------------------|
| DEMOGRAPHIC DATA                    |     |                         |                      |                      |                      |            |                        |
| Age, years                          | 119 | 65.5<br>(58.0;<br>75.5) | 73.0 (66.0;<br>81.0) | 80.5 (73.3;<br>82.0) | 80.0 (78.3;<br>86.5) | 0.009      |                        |
| Male, n (%)                         | 117 | 0 (0.0%)                | 34 (46.6 %)          | 5 (50.0 %)           | 8 (30.8 %)           | 0.008      | 0.005                  |
| Female, n (%)                       |     | 8 (100 %)               | 39 (53.4 %)          | 5 (50.0 %)           | 18 (69.2 %)          |            |                        |
| COMORBIDITY                         |     |                         |                      |                      |                      |            |                        |
| Respiratory<br>disease, n (%)       | 116 | 1<br>(12.5 %)           | 17 (23.6 %)          | 1 (10 %)             | 5 (19.2 %)           | 0.698      | 0.812                  |
| Urinary system<br>diseases, n (%)   | 117 | 0 (0.0 %)               | 23 (31.5 %)          | 4 (40.0 %)           | 4 (15.4 %)           | 0.093      | 0.086                  |
| Gastrointestinal<br>diseases, n (%) | 117 | 6<br>(75.0 %)           | 50 (68.5 %)          | 8 (80.0 %)           | 13 (50.9 %)          | 0.229      | 0.257                  |
| Oncology, n (%)                     | 115 | 0 (0.0 %)               | 4 (5.6 %)            | 0 (0.0 %)            | 0 (0.0 %)            | 0.463      | 0.785                  |
| Cerebrovascular<br>disease, n (%)   | 116 | 2<br>(25.0 %)           | 11 (15.3 %)          | 0 (0.0 %)            | 4 (15.4 %)           | 0.487      | 0.500                  |
| CAD RISK FACTORS                    |     |                         |                      |                      |                      |            |                        |
| Smoking history,<br>n (%)           | 79  | 4<br>(57.1 %)           | 21 (39.6 %)          | 1 (11.1 %)           | 1 (10.0 %)           | 0.070      | 0.073                  |
| Alcohol<br>consumption, n<br>(%)    | 84  | 1<br>(14.3 %)           | 5 (8.9 %)            | 0 (0.0 %)            | 0 (0.0 %)            | 0.489      | 0.554                  |
| Hypertension<br>history, n (%)      | 117 | 7 (87.5%)               | 69 (94.5%)           | 9 (90.0%)            | 24 (92.3%)           | 0.849      |                        |
| Diabetes, n (%)                     | 117 | 1 (12.5%)               | 25 (34.2 %)          | 5 (50.0 %)           | 3 (11.5 %)           | 0.185      | 0.083                  |
| INTENSIVE CARE MEASURES             |     |                         |                      |                      |                      |            |                        |
| MV, n (%)                           | 117 | 3<br>(37.5 %)           | 52 (71.2 %)          | 9 (90.0 %)           | 26 (100%)            | <0.00<br>1 | <0.001                 |
| IABP, n (%)                         | 110 | 0 (0.0 %)               | 7 (10.4 %)           | 10 (100 %)           | 10 (38.5 %)          | <0.00<br>1 | <0.001                 |

|                                      |     |                            |                         |                         |                         |            |       |
|--------------------------------------|-----|----------------------------|-------------------------|-------------------------|-------------------------|------------|-------|
| Inotropes, n (%)                     | 117 | 4<br>(50.0 %)              | 46 (63.0 %)             | 9 (90.0 %)              | 22 (84.6 %)             | 0.054      | 0.047 |
| RRT, n (%)                           | 109 | 0 (0.0 %)                  | 7 (10.1 %)              | 1 (10.0 %)              | 3 (13.0 %)              | 0.800      | 0.945 |
| Blood transfusion,<br>n (%)          | 117 | 1<br>(12.5 %)              | 14 (19.2 %)             | 4 (40.0 %)              | 5 (19.2 %)              | 0.432      | 0.491 |
| PCI, n (%)                           | 111 | 5<br>(62.5 %)              | 49 (70.0 %)             | 8 (80.0 %)              | 14 (60.9 %)             | 0.903      | 0.806 |
| DURATION OF INTENSIVE CARE MEASURES  |     |                            |                         |                         |                         |            |       |
| MV duration,<br>days                 | 90  | 1 (1.0;<br>1.0)            | 3.0 (1.0; 7.0)          | 2.0 (2.0; 8.0)          | 1.0 (1.0; 4.0)          | 0.070      |       |
| ICU LOS, days                        | 119 | 1.5 (1.0;<br>5.0)          | 5 (2.0; 13.0)           | 9.5 (4.0; 25.3)         | 1 (1.0; 5.0)            | <0.00<br>1 |       |
| In hospital LOS<br>days              | 117 | 5.0 (1.0;<br>10.3)         | 10.0 (3.0;<br>16.0)     | 10.5 (5.3; 25.3)        | 1.0 (1.0; 5.0)          | <0.00<br>1 |       |
| IABP duration,<br>hours.             | 24  | NaN                        | 61.0 (49.0;<br>61.0)    | 45.0 (30.0;<br>47.0)    | 129.0 (84.0;<br>664.0)  | 0.084      |       |
| Haemotransfusion<br>, doses          | 24  | NaN                        | 2.9 (2.0; 3.5)          | 6.3 (1.8; 8.5)          | 2.0 (1.0; 2.0)          | 0.404      |       |
| Duration of RRT,<br>min.             | 7   | NaN                        | 3.0 (2.8; 3.0)          | NaN                     | 3.0 (2.5; 3.5)          | 0.693      |       |
| CLINICAL DATA                        |     |                            |                         |                         |                         |            |       |
| GCS, score                           | 113 | 15.0<br>(15.0;<br>15.0)    | 13.0 (10.0;<br>15.0)    | 15.0 (14.0;<br>15.0)    | 8.0 (6.8; 12.0)         | <0.00<br>1 |       |
| SBP, mm Hg                           | 114 | 96.5<br>(86.3;<br>131.0)   | 90.0 (76.5;<br>106.0)   | 91.5 (89.3;<br>94.8)    | 70.0 (60.0;<br>86.0)    | <0.00<br>1 |       |
| Mean BP, mm<br>Hg <sup>a</sup>       | 115 | 72.2<br>(64.8;<br>93.8)    | 69.0 (53.0;<br>82.0)    | 71.0 (65.0;<br>85.0)    | 50.0 (44.0;<br>60.0)    | 0.001      |       |
| HR, beats per<br>minute              | 116 | 87.0<br>(77.0;<br>100.0)   | 87.0 (65.0;<br>108.0)   | 101.0(94.0;<br>117.0)   | 99.0 (70.0;<br>116.0)   | 0.406      |       |
| RR, per minute                       | 103 | 18.0<br>(17.8;<br>19.3)    | 18.0 (16.0;<br>22.0)    | 20.0 (17.0;<br>24.0)    | 18.0 (16.0;<br>20.0)    | 0.754      |       |
| CVP, mm Hg                           | 83  | 7.0 (6.0;<br>8.25)         | 12.0 (9.0;<br>16.0)     | 12.0 (9.0; 13.0)        | 16.0 (10.0;<br>18.0)    | 0.062      |       |
| PHv                                  | 95  | 7.39<br>(7.36;<br>7.44)    | 7.30 (7.27;<br>7.34)    | 7.29 (7.26;<br>7.31)    | 7.14 (7.06;<br>7.18)    | <0.00<br>1 |       |
| LABORATORY (first 24 hours)          |     |                            |                         |                         |                         |            |       |
| Lactate, mmol/L                      | 104 | 1.70<br>(1.30;<br>1.70)    | 3.4 (2.4; 5.6)          | 4.8 (4.2; 6.0)          | 8.6 (6.9; 11.4)         | <0.00<br>1 |       |
| Platelet,<br>10 <sup>3</sup> /microL | 117 | 222.0<br>(188.0;<br>263.0) | 248.0<br>(190.0; 296.0) | 202.0<br>(187.8; 269.8) | 184.0<br>(139.3; 238.0) | 0.032      |       |

|                                                             |     |                            |                         |                         |                         |       |        |
|-------------------------------------------------------------|-----|----------------------------|-------------------------|-------------------------|-------------------------|-------|--------|
| RBC count,<br>10 <sup>6</sup> /microL                       | 117 | 4.46<br>(4.10;<br>4.51)    | 4.38 (3.97;<br>5.05)    | 4.50 (4.28;<br>4.70)    | 4.19 (3.64;<br>4.90)    | 0.472 |        |
| Hemoglobin,<br>g/dL                                         | 117 | 132.0<br>(119.0;<br>143.0) | 133.0<br>(115.0;144.0)  | 129.0<br>(123.3; 135.8) | 119.0<br>(103.3; 137.8) | 0.320 |        |
| Hematocrit, %                                               | 117 | 0.37<br>(0.35;0.42<br>)    | 0.39 (0.34;<br>0.43)    | 0.38 (0.35;<br>0.40)    | 0.36 (0.31;<br>0.43)    | 0.609 |        |
| WBC, 10 <sup>9</sup> /microL                                | 117 | 12.2<br>(10.7;<br>13.9)    | 13.7 (10.4;<br>16.0)    | 11.5 (10.1;<br>14.6)    | 13.7 (8.8; 17.6)        | 0.856 |        |
| Monocytes,<br>10 <sup>9</sup> /microL                       | 117 | 1.15<br>(0.96;<br>1.23)    | 0.98 (0.68;<br>1.32)    | 0.53 (0.44;<br>0.68)    | 0.78 (0.49;<br>0.94)    | 0.005 |        |
| Creatinine,<br>mcmol/L                                      | 117 | 86.5<br>(76.0;<br>112.0)   | 131.0<br>(97.0; 166.0)  | 134.5<br>(104.0;172.5)  | 142.5<br>(116.0; 188.0) | 0.028 |        |
| eGFR according to<br>CKD-EPI,<br>mL/min/1.73 m <sup>2</sup> | 115 | 72.0<br>(56.3;<br>86.0)    | 39.5(28.3;<br>56.0)     | 37.0 (28.5;<br>46.5)    | 35.0 (23.0;<br>47.0)    | 0.006 |        |
| Total protein,<br>g/dL                                      | 74  | 64.5<br>(60.9;<br>69.4)    | 66.0 (59.4;<br>72.0)    | 65.0 (59.3;<br>68.8)    | 62.4 (53.9;<br>65.0)    | 0.417 |        |
| Glucose, mmol/L                                             | 116 | 7.73<br>(6.59;<br>8.87)    | 10.6 (8.5;<br>15.8)     | 11.0 (9.2; 14.5)        | 13.2 (8.2; 16.7)        | 0.235 |        |
| TBil, mcmoll/L                                              | 80  | 10.6<br>(6.88;<br>24.2)    | 14.2 (10.0;<br>21.7)    | 19.0 (13.0;<br>28.4)    | 16.2 (11.3;<br>43.4)    | 0.612 |        |
| ECHOCARDIOGRAPHY AT ADMISSION                               |     |                            |                         |                         |                         |       |        |
| SV, mL                                                      | 53  | 60.0(43.5;<br>65.0)        | 41.0 (36.0;<br>52.0)    | 37.0 (31.0;<br>38.0)    | 41.5<br>(32.0; 52.3)    | 0.504 |        |
| MM, g/mL                                                    | 42  | 267.0<br>(209.0;<br>288.0) | 211.0<br>(180.0; 248.0) | NaN                     | 204.0<br>(174.3; 272.8) | 0.891 |        |
| MMI                                                         | 42  | 142.0<br>(114.0;<br>143.0) | 112.0<br>(99.0; 128.0)  | NaN                     | 112.0<br>(103.0; 151.0) | 0.815 |        |
| IVC, mm                                                     | 51  | 16.0<br>(15.0;<br>17.0)    | 20.5 (17.4;<br>22.1)    | 20.0 (17.8;<br>20.0)    | 19.0 (18.0;<br>22.5)    | 0.430 |        |
| LA, mL                                                      | 53  | 81.2<br>(73.8;<br>88.6)    | 61.5 (43.5;<br>92.0)    | 41.0 (40.0;<br>47.0)    | 52.6 (43.3;<br>72.0)    | 0.344 |        |
| RA, mL                                                      | 34  | 70.2<br>(59.3;<br>81.0)    | 59.7 (42.0;<br>88.3)    | NaN                     | 53.0 (40.0;<br>70.0)    | 0.604 |        |
| Mortality, n (%)                                            | 117 | 3 (37.5%)                  | 32 (43.8 %)             | 6 (60.0 %)              | 23 (88.5 %)             | 0.002 | <0.001 |
| RISK SCALES                                                 |     |                            |                         |                         |                         |       |        |

|                                         |     |                         |                      |                      |                      |            |
|-----------------------------------------|-----|-------------------------|----------------------|----------------------|----------------------|------------|
| ORBI, score                             | 79  | 10.5<br>(8.50;<br>12.5) | 17.0 (12.0;<br>18.3) | 19.0 (15.5;<br>22.5) | 19.0 (14.0;<br>22.0) | 0.054      |
| ORBI, %                                 | 79  | 9.0 (5.2;<br>15.6)      | 35.4 (12.4;<br>45.6) | 54.2 (28.3;<br>72.7) | 47.0 (21.7;<br>70.0) | 0.045      |
| SOFA, score (at<br>admission)           | 27  | 5.0 (5.0;<br>5.0)       | 10.0 (6.0;<br>12.5)  | 10.5 (10.0;<br>11.0) | 14.5 (11.0;<br>15.0) | 0.129      |
| GRACE, %                                | 117 | 7.5 (6.0;<br>16.3)      | 30.0 (12.0;<br>50.0) | 29.5 (14.0;<br>53.3) | 60.0 (40.0;<br>80.0) | <0.00<br>1 |
| CRUSADE, %                              | 117 | 9.3 (6.5;<br>10.4)      | 13.6 (10.7;<br>19.5) | 15.5 (9.0; 19.5)     | 19.5 (16.7;<br>19.5) | 0.002      |
| GENEVA, score                           | 116 | 4.0 (1.0;<br>5.0)       | 4 (1.0; 6.0)         | 6.0 (4.3; 6.0)       | 5.0 (1.0; 6.0)       | 0.136      |
| DOSAGE OF VASOPRESSORS                  |     |                         |                      |                      |                      |            |
| Dopamine dosage,<br>mcg/kg/min          | 60  | 5.0 (4.0;<br>6.0)       | 5.0 (5.0; 10.0)      | 7.0 (3.5;8.0)        | 10 (6.0; 13.8)       | 0.113      |
| Epinephrine<br>dosage,<br>mcg/kg/min    | 11  | NaN                     | 0.05 (0.02;<br>0.1)  | NaN                  | 0.1 (0.1; 0.2)       | 0.146      |
| Nonepinephrine<br>dosage,<br>mcg/kg/min | 51  | 0.05<br>(0.05;<br>0.05) | 0.25 (0.18;<br>0.50) | 0.3 (0.15; 0.60)     | 0.4 (0.25; 0.90)     | 0.095      |
| VIS at admission                        | 84  | 5.0 (2.5;<br>6.0)       | 10.0 (5.0;<br>29.0)  | 23.5 (8.5; 46.0)     | 40.0 (10.0;<br>62.0) | 0.023      |

Footnotes: Data displayed as n (%) for categorical variables and median (interquartile range) for continuous variables. P value is for  $\chi^2$  test and Fisher's exact test was used for small samples (categorical variables) and Kruskal-Wallis test (continuous variables). <sup>a</sup> Measured as DBP + 1/3(SBP-DBP). Abbreviation: BP, blood pressure; CABG, coronary artery bypass graft; CAD, coronary artery disease; CI, cardiac index; CO, cardiac output; CPK, creatine phosphokinase; CVP, central venous pressure; EF, ejection fraction; eGFR, estimated glomerular filtration rate; EDV, end-diastolic volume; ESV, end-systolic volume; GCS, Glasgow coma scale; HR, heart rate; IABP, intra-aortic balloon pump; ICU, intensive care unit; IVC, inferior vena cava; IVLC, index of violation of local contractility; LA, left atrium artificial lung ventilation; LV MMI, left ventricular myocardial mass index; LV, left ventricular; MI, myocardial infarction; MM, myocardial mass; LOS, length of stay; PCWP, pulmonary capillary wedge pressure; MV, mechanical lung ventilation; PCI, percutaneous coronary intervention; RA, right atrium; RBC, red blood cells; RR, respiratory rate; RRT, renal replacement therapy; RV, right ventricular; SBP, systolic blood pressure; STEMI, ST elevation myocardial infarction; SV, stroke volume; TBil, total bilirubin; VIS, vasoactive inotropic score; WBC, white blood cells.

**Table S4.** Model Coefficients—Levels SCAI: 2,3,4,5, reference level is 5.

| Model Coefficients – Levels SCAI: 2,3,4,5, reference level is 5 |                                                    |            |         |             |          |
|-----------------------------------------------------------------|----------------------------------------------------|------------|---------|-------------|----------|
| Levels<br>2,3,4,5                                               | Predictor                                          | Estimate   | SE      | Z           | P        |
| 2 - 5                                                           | Constant                                           | -272.79614 | 0.19151 | -1424.47738 | 0.000000 |
|                                                                 | MV: 1- yes, 2- no; 2 – 1                           | 61.90871   | 1.32726 | 46.64390    | 0.000000 |
|                                                                 | Lactate at the admission >2<br>mmol/L: 1-yes, 2-no | 1.47884    | 3.24233 | 0.45610     | 0.648316 |
|                                                                 | Monocytes at the admission                         | 1.80463    | 1.59316 | 1.13273     | 0.257326 |

|       |                                                    |            |         |                |          |
|-------|----------------------------------------------------|------------|---------|----------------|----------|
|       | SBP                                                | 0.06002    | 0.05211 | 1.15190        | 0.249362 |
|       | pHv                                                | 35.73758   | 1.21156 | 29.49705       | 0.000000 |
|       | spO2/FioO2                                         | -0.00315   | 0.01290 | -0.24450       | 0.806845 |
|       | IABP - 1, without IABP – 2; 2<br>– 1               | 0.07414    | 6.45575 | 0.01148        | 0.990837 |
| 3 - 5 | Constant                                           | -134.19794 | 0.15711 | -854.18008     | 0.000000 |
|       | MV: 1- yes, 2- no; 2 – 1                           | 56.99527   | 1.32726 | 42.94193       | 0.000000 |
|       | Lactate at the admission >2<br>mmol/L: 1-yes, 2-no | -2.94693   | 1.58835 | -1.85534       | 0.063548 |
|       | Monocytes at the admission                         | 2.01875    | 0.95866 | 2.10579        | 0.035222 |
|       | SBP                                                | 0.03170    | 0.01782 | 1.77870        | 0.075289 |
|       | pHv                                                | 18.05461   | 0.41444 | 43.56366       | 0.000000 |
|       | spO2/FioO2                                         | 0.00959    | 0.00658 | 1.45734        | 0.145023 |
|       | IABP - 1, without IABP – 2; 2<br>– 1               | 1.73392    | 1.25690 | 1.37952        | 0.167735 |
|       | Constant                                           | -18.82212  | 0.09941 | -189.33695     | 0.000000 |
|       | MV: 1- yes, 2- no; 2 – 1                           | 83.71000   | 0.00000 | 52677889.26618 | 0.000000 |
| 4 - 5 | Lactate at the admission >2<br>mmol/L: 1-yes, 2-no | -24.68303  | 0.09941 | -248.29351     | 0.000000 |
|       | Monocytes at the admission                         | -11.86619  | 0.09313 | -127.41874     | 0.000000 |
|       | SBP                                                | 0.07393    | 0.05369 | 1.37704        | 0.168499 |
|       | pHv                                                | 6.06121    | 0.70977 | 8.53972        | 0.000000 |
|       | spO2/FioO2                                         | 0.00317    | 0.01048 | 0.30244        | 0.762313 |
|       | IABP - 1, without IABP – 2; 2<br>– 1               | -41.58445  | 0.00000 | -6168406.31    | 0.000000 |

| Model Fit Measures                              |          |          |                             |                    |    |            |
|-------------------------------------------------|----------|----------|-----------------------------|--------------------|----|------------|
| Model                                           | Deviance | AIC      | R <sup>2</sup> <sub>N</sub> | Overall Model Test |    |            |
|                                                 |          |          |                             | $\chi^2$           | df | P          |
| 1                                               | 36.58527 | 84.58527 | 0.78079                     | 102.27894          | 21 | 1.1383e-12 |
| Omnibus Likelihood Ratio Tests                  |          |          |                             |                    |    |            |
| Predictor                                       |          |          |                             | $\chi^2$           | Df | P          |
| MV: 1- yes, 2- no                               |          |          |                             | 5.60384            | 3  | 0.132558   |
| Lactate at the admission >2 mmol/L: 1-yes, 2-no |          |          |                             | 5.49434            | 3  | 0.138978   |
| Monocytes at the admission                      |          |          |                             | 6.09025            | 3  | 0.107301   |
| SBP                                             |          |          |                             | 6.24653            | 3  | 0.100213   |
| pHv                                             |          |          |                             | 22.19635           | 3  | 5.9373e-5  |
| IABP - 1, without IABP – 2                      |          |          |                             | 6.55931            | 3  | 0.087353   |
| spO2/FioO2                                      |          |          |                             | -5.24009           | 3  | 1.000000   |

Abbreviation: SBP, systolic blood pressure; IABP, intra-aortic balloon pump; MV, mechanical ventilation.
